# Supplementary material
Source: PubMed Central journal article supplement (PMC6013674)
Supplement: IAI.00143-18_zii999092436s1.pdf [file IAI.00143-18_zii999092436s1.pdf]

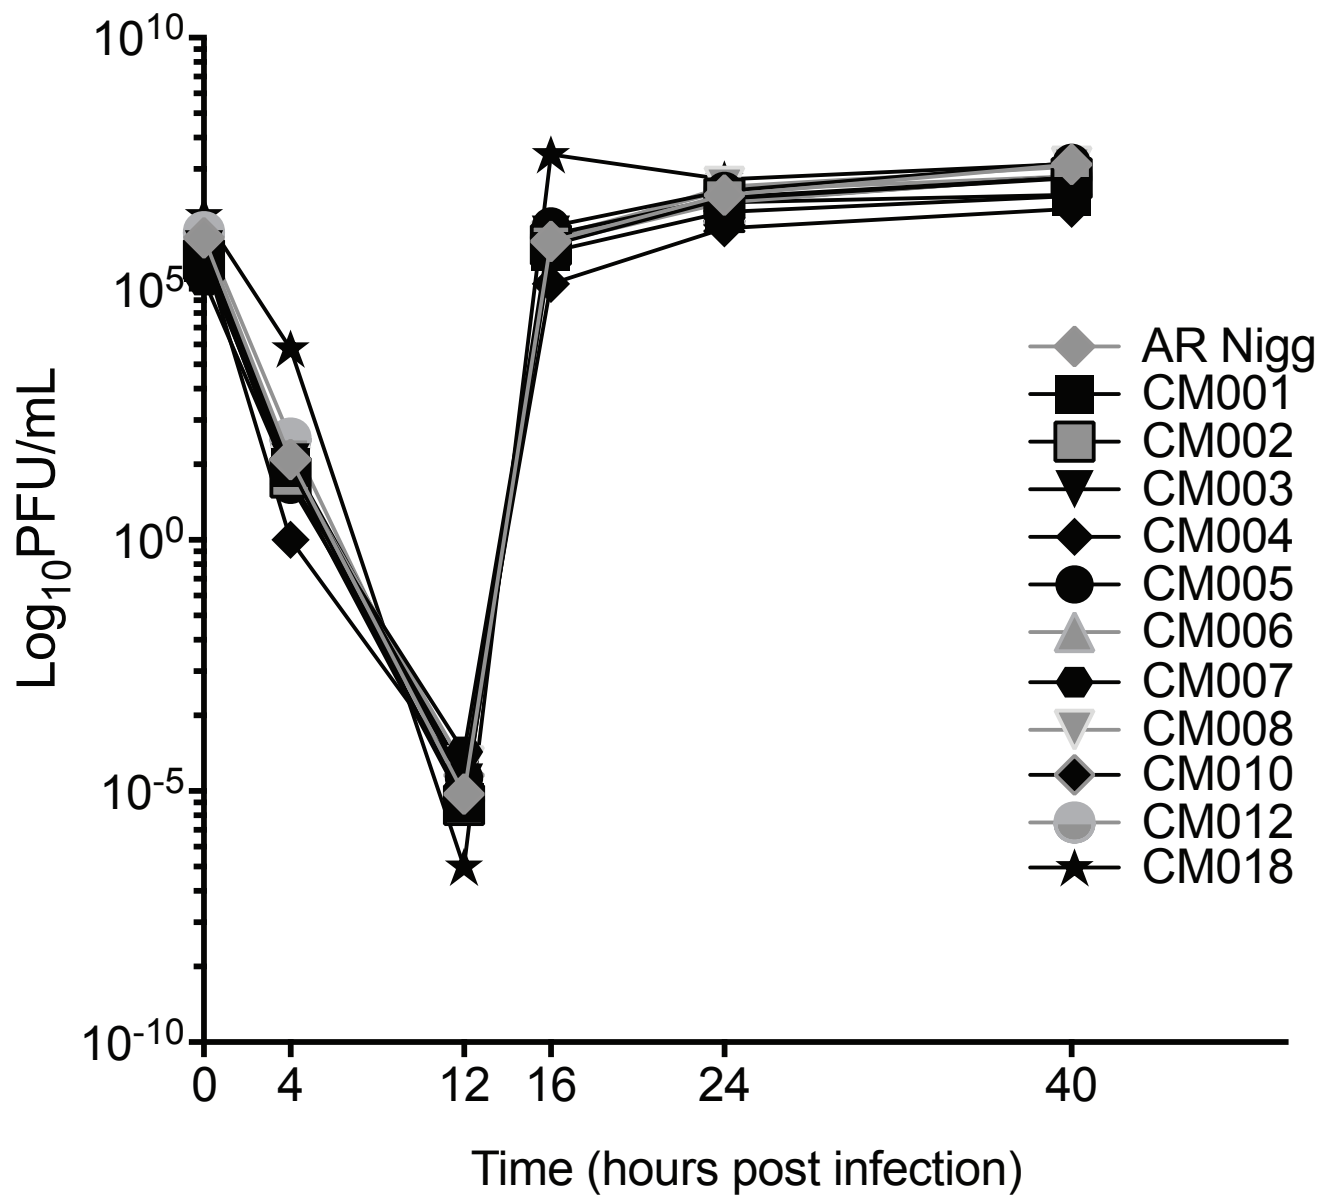

**FIG. S1.** Growth kinetics of *Chlamydia muridarum* Nigg and plaque-purified isolates in L929 cells.

```

TC_0447      1 -----MTSPL-----STAASSYLRT--LQRAFPLGGGGYPT--N-----PNSAQTALRV---
TC_0434      1 -----MTAPL-----ITTTSPYLRL--LQKRFLGGSRLGPY--SLLFYET-----PAHRILTT-----TPSQEGMTSTKKIQG
TC_0435      1 -----MVSP-----ITTTSPYLLT--LQAR-----LLF-----TLTTS-----CSSQNQKCAKKIQE
TC_0436      1 MDPIRGFHQKSSKKIRSF--MRINETHLFV--LQERFLSWGGA--SSLFSWI-----PARRTLLTP-----SPYQQKEIFTEKVQK
TC_0440      1 -----MCSFPCPRHLFPVIVTDCPTCTSP--LRKRPLSSTTAAAVVVTQLFKYHRRKDLSHRVIYDYDHGKNKTPRKIQCSSNRHSLATSSKTSKSSSRKILR
TC_0433      1 ---MRAEFNIVKTKQKYMCSFCSRHFIPVDCPTCTSP--LRKRSLSTTAAALVATKVKFYPRKDLSHRVIYDYDHGKNKPARRIQFGSDRHSLETSSKTSRSSSRKILK
TC_0432
TC_0357      1 -----MKKTKQLISKI-----TFSLISLFIGG-----YLLKAPPNPQSSDTFQTFIE--
NucT (H. pylori)

TC_0447      41 --QTAATSLAIVPYRPLSSEPVSF--SKHCKNDAQSIIENAILSASSVFLKIFLSSEPIVQDLICKSEESIPVTIHYQH--IPEPIVKNLEEAGAEIRCHRNR
TC_0434      61 LTQTRIQSLTILVPSYPLSPPVCF--SRHCRYNALEIIEHAILSATTSIVLNTFNLSSERLIQALVLKAQQGVSVTVQYHH--MLSNTWFKLCKPNIEIIPLG-SKR
TC_0435      43 L--TRPSSLALVPYSRPLSSETVCF--SKHCGYNALDLIEKVLSATSSIVLKNVVPSSKSLAQALILKALQGVVPSIHCPH--KTLKALGDLSKQTN--VTLY-SSH
TC_0436      78 LPTP--SSLALIPYWNSSPSESICF--SKHCGHDAINVIETAILSAKTSIFLKFISISSKKITRALAKSIQGVSVSMLYHH--ISTKTYSDLSKTTIELIQFQENSH
TC_0440      94 ARRTGSS--VP--RPIAQQLITFISAQKTSNSNPKSICKFIDRTHQNLIHQVCFNHPTIIQHHLVKAAREVRVSVQYRDGTELEEACKD-STICLQKQS----GR
TC_0433      107 ARRTES--VP--RPVAQQLITFVSAQQTNSNPLSAICKLMLNLSKRLFIQVYRFTHTPIIQHALNVAAKNVRTVLFVFRDGDDELVEASQG-SPIILEQQP----QR
TC_0432      1 -----MSVICKLMLNQA--SLFIQVYRFTHTPIIQHALNVAAKNVRTVLFVFRDGDDELISAAQN-SSIILQQP----GR
TC_0357      43 -----SNEPIIF--SKQCGDNITQVLCDAINSAKKDI--FLSIYDLSSAII--SELKKQEE--SQIPLCI---HYQRISKSTNFSPPQLTVEHPPVK
NucT (H. pylori)

TC_0447      144 SLLHRKTMILDEKQVITGSANFTRNSINNDVNLARVNVNHIANLMOQKQKGAIIENSTKGGKQIVCYLFI-N-HKKCGN-ER-QIVKA--INNATSSIQIGMCIILTHRG
TC_0434      165 SLFHKKTLIIDKQVITGTGNFTIASLHRDVLNMMRVNSPELADLMEKNQKGVKCV----GEQTCYRPM-N-NRLDGN-EG-KILKE-IQKASSIQLGMCILTNEV
TC_0435      143 ASSDKQTLIVDEHQVVTGARNFTTSLHREANLMMRISLDELANLIEKNQKGEVCL----GQKVCYCFI-SKNKKG-N-EK-EILKE-IQKATSSIQLGTSCLTSQSI
TC_0436      181 ALLHNKTLIIDKQIITGNFTSASLCEVNLMMRINNMHLASLMEKNQAGRACI----KKQKRYLFPV-NR-----KG-EIVKE-IQKASSIQLGMYIILTNEAI
TC_0440      193 SLFHKSMVGSQRVLA--SSGFTPDSTEQDINLSLINDSELARHIETNQVTRQI----GNQFLVYIFIFRNRK-DFRLAV-RTIKKCAQAKKIVVVVYIILTHPVI
TC_0433      206 ALFHRKSLVVDHRMLLVSTGNFTINSTEQDINLSIVFHHSKLAARVEHSQPFSGVV----GNQPVSYLPIFRNRKSSQIGG-QFIQSFIEEAKSSILIAMYILSHPGI
TC_0432      69 SLFHRKSLVVDNKKLFISTGNFTINSTEQDINLSAIFKDALATRVAC--SFTGII----GSQVLSYLFYRRSQKSSQIGI-HLVQDLIQNAKSNILIAMYILSHPGI
TC_0357      128 KLMHOKTMAIDGKTAWIASANLFTSLEKSANLVIGLKSPELCHFIKTQTSIGICCI----NNQPIEYFSL----NEGNSAALEKVLQHIRSAKESIQIGMFALTLPQI
NucT (H. pylori)

TC_0447      249 LQALNEAATQRSVLVTIIID----SLESQOTIDILKALG---SKLRVVRGT-GDR----IHCACILDHNTAIIIG-SANWAASGLKANKEDIIVNPLTERQREDLSIWW
TC_0434      265 IQAINEAA-KRSVLVTIIID----PHKKAQTLLEMLKSLN---SQITLRIVTLFPY--MHCKVCIIDHKTIVIG-SSNWSIRGLNANKEEVLIIINPLTESQKQDLNTWW
TC_0435      244 ILALDEAV-TRSVIVTVIID----SNKQYTLLEKLSL---TKINIRVGTSS--SNCQVCIVDHTTAIIIGCSSNRPTRRQNANQEAVALIISPLTECQKQDLCTWW
TC_0436      276 IKALDEAASQRSVLVTIIID----SITKQTLGLTKALN---SKIRVRAGTLASC---IHCKVCIIIDHKTIVIG-SANWSNRGLNNTKEDLLIISPLTEGQKQDLCTWW
TC_0440      296 LKSL-QAAAARGVKVEVAVD---TRESEQTQRTLERLQ---LSLPLRVRKPGAPR---VHVKMCYIDNKILICG-SANWSSAGLTRNREDFVIRGLTETQKQSLSEIW
TC_0433      310 LQSI-QAAAARGVKVQIAID---TRESKQTQRTLERLQ---LSLPLRVRKPGSPP---LHVKMCIDGKTLIFG-SANWSLVGLARNVEDLFIVRNLTALQYQSLSEIW
TC_0432      173 LQAL-QAAAARGVKVEVAVD---TRESKQTQRTLERLQ---LSLPLRVRKPGSPP---LHVKMCIDNKILIIIG-SSNWSFVGLARNTEDLFIVRGLTETQKQSLSEIW
TC_0357      228 IKELNNA-QNRGVDVVLVD---KGFKSLTLKIQQLIQLIHPSLSIYEKV-TPYQ----LHKKFGIFDKKTLITG-SVNWSEKGFLLNTEDMIVIENTERQKQCKIAIW
NucT (H. pylori)

TC_0447      346 RYLCDNS-AI-----LPED-----
TC_0434      362 HFLCENSTAI-----TYEEAENA--DSSSEQELS-----
TC_0435      341 RSLCDSSTAI-----TYEEAENA--DSSSE-----
TC_0436      374 HFLCENSTVL-----A--EETKTPKILD-----
TC_0440      394 QSVEEKTEPLTAQSLKRPREEEDDPGEGTSSGISSAGASAKKAKTQ
TC_0433      408 KAVEENTQP----LKRSREEEEDPLEGTSSTQEDLSPPTKKARTQ

```

**Fig. S2.** Sequence alignment of the outer membrane-associated nuclease NucT of *Helicobacter pylori* G27 (1) with phosphatidyl choline-hydrolysing phospholipase D proteins of *C. muridarum*. Alignment generated using CLUSTAL(2). Blue highlighting indicates amino acids conserved in  $\geq 60\%$  of aligned proteins, red stars denote functional residues important for NucT function (3).

|          | 10          | 20        | 30         | 40        | 50       | 60          | 70      | 80         | 90          | 100        | 110       | 120        | 130           | 140    | 150      | 160       | 170        | 180  |                 |
|----------|-------------|-----------|------------|-----------|----------|-------------|---------|------------|-------------|------------|-----------|------------|---------------|--------|----------|-----------|------------|------|-----------------|
| CM001    | MKKLLKSVLAF | AVLGSASSL | HALPVGNPAE | PSLMIDGIL | WEGFGGDP | CDPCTTWCDAI | SLRLGGY | GDFVDRVLKT | DVNVKQFEMGA | AAPTGDADLT | TAPTASREN | PAYGKHMQDA | EMFTNAAYMALNI | WDRFDV | FCTLGATS | GYLKGNSAA | AFNLVGLFGR | DETA | VAADDIPNVLSQAVV |
| CMUT3-5  | MKKLLKSVLAF | AVLGSASSL | HALPVGNPAE | PSLMIDGIL | WEGFGGDP | CDPCTTWCDAI | SLRLGGY | GDFVDRVLKT | DVNVKQFEMGA | AAPTGDADLT | TAPTASREN | PAYGKHMQDA | EMFTNAAYMALNI | WDRFDV | FCTLGATS | GYLKGNSAA | AFNLVGLFGR | DETA | VAADDIPNVLSQAVV |
| G0.1.1   | MKKLLKSVLAF | AVLGSASSL | HALPVGNPAE | PSLMIDGIL | WEGFGGDP | CDPCTTWCDAI | SLRLGGY | GDFVDRVLKT | DVNVKQFEMGA | AAPTGDADLT | TAPTASREN | PAYGKHMQDA | EMFTNAAYMALNI | WDRFDV | FCTLGATS | GYLKGNSAA | AFNLVGLFGR | DETA | VAADDIPNVLSQAVV |
| G28.38.1 | MKKLLKSVLAF | AVLGSASSL | HALPVGNPAE | PSLMIDGIL | WEGFGGDP | CDPCTTWCDAI | SLRLGGY | GDFVDRVLKT | DVNVKQFEMGA | AAPTGDADLT | TAPTASREN | PAYGKHMQDA | EMFTNAAYMALNI | WDRFDV | FCTLGATS | GYLKGNSAA | AFNLVGLFGR | DETA | VAADDIPNVLSQAVV |
| Nigg3-28 | MKKLLKSVLAF | AVLGSASSL | HALPVGNPAE | PSLMIDGIL | WEGFGGDP | CDPCTTWCDAI | SLRLGGY | GDFVDRVLKT | DVNVKQFEMGA | AAPTGDADLT | TAPTASREN | PAYGKHMQDA | EMFTNAAYMALNI | WDRFDV | FCTLGATS | GYLKGNSAA | AFNLVGLFGR | DETA | VAADDIPNVLSQAVV |
| CM006    | MKKLLKSVLAF | AVLGSASSL | HALPVGNPAE | PSLMIDGIL | WEGFGGDP | CDPCTTWCDAI | SLRLGGY | GDFVDRVLKT | DVNVKQFEMGA | AAPTGDADLT | TAPTASREN | PAYGKHMQDA | EMFTNAAYMALNI | WDRFDV | FCTLGATS | GYLKGNSAA | AFNLVGLFGR | DETA | VAADDIPNVLSQAVV |
| Var003   | MKKLLKSVLAF | AVLGSASSL | HALPVGNPAE | PSLMIDGIL | WEGFGGDP | CDPCTTWCDAI | SLRLGGY | GDFVDRVLKT | DVNVKQFEMGA | AAPTGDADLT | TAPTASREN | PAYGKHMQDA | EMFTNAAYMALNI | WDRFDV | FCTLGATS | GYLKGNSAA | AFNLVGLFGR | DETA | VAADDIPNVLSQAVV |
| Var004   | MKKLLKSVLAF | AVLGSASSL | HALPVGNPAE | PSLMIDGIL | WEGFGGDP | CDPCTTWCDAI | SLRLGGY | GDFVDRVLKT | DVNVKQFEMGA | AAPTGDADLT | TAPTASREN | PAYGKHMQDA | EMFTNAAYMALNI | WDRFDV | FCTLGATS | GYLKGNSAA | AFNLVGLFGR | DETA | VAADDIPNVLSQAVV |
| Nigg     | MKKLLKSVLAF | AVLGSASSL | HALPVGNPAE | PSLMIDGIL | WEGFGGDP | CDPCTTWCDAI | SLRLGGY | GDFVDRVLKT | DVNVKQFEMGA | AAPTGDADLT | TAPTASREN | PAYGKHMQDA | EMFTNAAYMALNI | WDRFDV | FCTLGATS | GYLKGNSAA | AFNLVGLFGR | DETA | VAADDIPNVLSQAVV |
| Nigg2MCR | MKKLLKSVLAF | AVLGSASSL | HALPVGNPAE | PSLMIDGIL | WEGFGGDP | CDPCTTWCDAI | SLRLGGY | GDFVDRVLKT | DVNVKQFEMGA | AAPTGDADLT | TAPTASREN | PAYGKHMQDA | EMFTNAAYMALNI | WDRFDV | FCTLGATS | GYLKGNSAA | AFNLVGLFGR | DETA | VAADDIPNVLSQAVV |
| Var001   | MKKLLKSVLAF | AVLGSASSL | HALPVGNPAE | PSLMIDGIL | WEGFGGDP | CDPCTTWCDAI | SLRLGGY | GDFVDRVLKT | DVNVKQFEMGA | AAPTGDADLT | TAPTASREN | PAYGKHMQDA | EMFTNAAYMALNI | WDRFDV | FCTLGATS | GYLKGNSAA | AFNLVGLFGR | DETA | VAADDIPNVLSQAVV |
| Var001.1 | MKKLLKSVLAF | AVLGSASSL | HALPVGNPAE | PSLMIDGIL | WEGFGGDP | CDPCTTWCDAI | SLRLGGY | GDFVDRVLKT | DVNVKQFEMGA | AAPTGDADLT | TAPTASREN | PAYGKHMQDA | EMFTNAAYMALNI | WDRFDV | FCTLGATS | GYLKGNSAA | AFNLVGLFGR | DETA | VAADDIPNVLSQAVV |

  

|          | 190      | 200 | 210     | 220      | 230    | 240     | 250  | 260     | 270     | 280    | 290      | 300   | 310   | 320    | 330     | 340    | 350    | 360    |       |         |        |       |       |       |       |      |       |      |       |       |       |       |
|----------|----------|-----|---------|----------|--------|---------|------|---------|---------|--------|----------|-------|-------|--------|---------|--------|--------|--------|-------|---------|--------|-------|-------|-------|-------|------|-------|------|-------|-------|-------|-------|
| CM001    | ELYTDTAF | AVS | VGARAAL | WECGCATL | GFQYAQ | SKPKVEE | LNVL | CNAAEFT | INKPKGY | VGGQEF | PLNIKAGT | VSATD | TKDAS | IDYHEW | QASLALS | YRLNMF | TPYIGV | KWSRAS | FDADT | IRIAQPK | LETSIL | KMT   | TWNPT | ISGSG | IDVDT | KITD | TLQIV | SLQL | LNKMK | SRKSC | GLAIG | TITIV |
| CMUT3-5  | ELYTDTAF | AVS | VGARAAL | WECGCATL | GFQYAQ | SKPKVEE | LNVL | CNAAEFT | INKPKGY | VGGQEF | PLNIKAGT | VSATD | TKDAS | IDYHEW | QASLALS | YRLNMF | TPYIGV | KWSRAS | FDADT | IRIAQPK | LETSIL | KMT   | TWNPT | ISGSG | IDVDT | KITD | TLQIV | SLQL | LNKMK | SRKSC | GLAIG | TITIV |
| G0.1.1   | ELYTDTAF | AVS | VGARAAL | WECGCATL | GFQYAQ | SKPKVEE | LNVL | CNAAEFT | INKPKGY | VGGQEF | PLNIKAGT | VSATD | TKDAS | IDYHEW | QASLALS | YRLNMF | TPYIGV | KWSRAS | FDADT | IRIAQPK | LETSIL | KMT   | TWNPT | ISGSG | IDVDT | KITD | TLQIV | SLQL | LNKMK | SRKSC | GLAIG | TITIV |
| G28.38.1 | ELYTDTAF | AVS | VGARAAL | WECGCATL | GFQYAQ | SKPKVEE | LNVL | CNAAEFT | INKPKGY | VGGQEF | PLNIKAGT | VSATD | TKDAS | IDYHEW | QASLALS | YRLNMF | TPYIGV | KWSRAS | FDADT | IRIAQPK | LETSIL | KMT   | TWNPT | ISGSG | IDVDT | KITD | TLQIV | SLQL | LNKMK | SRKSC | GLAIG | TITIV |
| Nigg3-28 | ELYTDTAF | AVS | VGARAAL | WECGCATL | GFQYAQ | SKPKVEE | LNVL | CNAAEFT | INKPKGY | VGGQEF | PLNIKAGT | VSATD | TKDAS | IDYHEW | QASLALS | YRLNMF | TPYIGV | KWSRAS | FDADT | IRIAQPK | LETSIL | KMT   | TWNPT | ISGSG | IDVDT | KITD | TLQIV | SLQL | LNKMK | SRKSC | GLAIG | TITIV |
| CM006    | ELYTDTAF | AVS | VGARAAL | WECGCATL | GFQYAQ | SKPKVEE | LNVL | CNAAEFT | INKPKGY | VGGQEF | PLNIKAGT | VSATD | TKDAS | IDYHEW | QASLALS | YRLNMF | TPYIGV | KWSRAS | FDADT | IRIAQ   | PKLETS | ILKMT | TWNPT | ISGSG | IDVDT | KITD | TLQIV | SLQL | LNKMK | SRKSC | GLAIG | TITIV |
| Var003   | ELYTDTAF | AVS | VGARAAL | WECGCATL | GFQYAQ | SKPKVEE | LNVL | CNAAEFT | INKPKGY | VGGQEF | PLNIKAGT | VSATD | TKDAS | IDYHEW | QASLALS | YRLNMF | TPYIGV | KWSRAS | FDADT | IRIAQ   | PKLETS | ILKMT | TWNPT | ISGSG | IDVDT | KITD | TLQIV | SLQL | LNKMK | SRKSC | GLAIG | TITIV |
| Var004   | ELYTDTAF | AVS | VGARAAL | WECGCATL | GFQYAQ | SKPKVEE | LNVL | CNAAEFT | INKPKGY | VGGQEF | PLNIKAGT | VSATD | TKDAS | IDYHEW | QASLALS | YRLNMF | TPYIGV | KWSRAS | FDADT | IRIAQ   | PKLETS | ILKMT | TWNPT | ISGSG | IDVDT | KITD | TLQIV | SLQL | LNKMK | SRKSC | GLAIG | TITIV |
| Nigg     | ELYTDTAF | AVS | VGARAAL | WECGCATL | GFQYAQ | SKPKVEE | LNVL | CNAAEFT | INKPKGY | VGGQEF | PLNIKAGT | VSATD | TKDAS | IDYHEW | QASLALS | YRLNMF | TPYIGV | KWSRAS | FDADT | IRIAQ   | PKLETS | ILKMT | TWNPT | ISGSG | IDVDT | KITD | TLQIV | SLQL | LNKMK | SRKSC | GLAIG | TITIV |
| Nigg2MCR | ELYTDTAF | AVS | VGARAAL | WECGCATL | GFQYAQ | SKPKVEE | LNVL | CNAAEFT | INKPKGY | VGGQEF | PLNIKAGT | VSATD | TKDAS | IDYHEW | QASLALS | YRLNMF | TPYIGV | KWSRAS | FDADT | IRIAQ   | PKLETS | ILKMT | TWNPT | ISGSG | IDVDT | KITD | TLQIV | SLQL | LNKMK | SRKSC | GLAIG | TITIV |
| Weiss    | ELYTDTAF | AVS | VGARAAL | WECGCATL | GFQYAQ | SKPKVEE | LNVL | CNAAEFT | INKPKGY | VGGQEF | PLNIKAGT | VSATD | TKDAS | IDYHEW | QASLALS | YRLNMF | TPYIGV | KWSRAS | FDADT | IRIAQ   | PKLETS | ILKMT | TWNPT | ISGSG | IDVDT | KITD | TLQIV | SLQL | LNKMK | SRKSC | GLAIG | TITIV |
| Var001   | ELYTDTAF | AVS | VGARAAL | WECGCATL | GFQYAQ | SKPKVEE | LNVL | CNAAEFT | INKPKGY | VGGQEF | PLNIKAGT | VSATD | TKDAS | IDYHEW | QASLALS | YRLNMF | TPYIGV | KWSRAS | FDADT | IRIAQ   | PKLETS | ILKMT | TWNPT | ISGSG | IDVDT | KITD | TLQIV | SLQL | LNKMK | SRKSC | GLAIG | TITIV |
| Var001.1 | ELYTDTAF | AVS | VGARAAL | WECGCATL | GFQYAQ | SKPKVEE | LNVL | CNAAEFT | INKPKGY | VGGQEF | PLNIKAGT | VSATD | TKDAS | IDYHEW | QASLALS | YRLNMF | TPYIGV | KWSRAS | FDADT | IRIAQ   | PKLETS | ILKMT | TWNPT | ISGSG | IDVDT | KITD | TLQIV | SLQL | LNKMK | SRKSC | GLAIG | TITIV |

  

|          | 370      | 380     |           |     |
|----------|----------|---------|-----------|-----|
| CM001    | DADKYAVT | VETRLID | ERAHHVNAQ | FRF |
| CMUT3-5  | DADKYAVT | VETRLID | ERAHHVNAQ | FRF |
| G0.1.1   | DADKYAVT | VETRLID | ERAHHVNAQ | FRF |
| G28.38.1 | DADKYAVT | VETRLID | ERAHHVNAQ | FRF |
| Nigg3-28 | DADKYAVT | VETRLID | ERAHHVNAQ | FRF |
| CM006    | DADKYAVT | VETRLID | ERAHHVNAQ | FRF |
| Var003   | DADKYAVT | VETRLID | ERAHHVNAQ | FRF |
| Var004   | DADKYAVT | VETRLID | ERAHHVNAQ | FRF |
| Nigg     | DADKYAVT | VETRLID | ERAHHVNAQ | FRF |
| Nigg2MCR | DADKYAVT | VETRLID | ERAHHVNAQ | FRF |
| Weiss    | DADKYAVT | VETRLID | ERAHHVNAQ | FRF |
| Var001   | DADKYAVT | VETRLID | ERAHHVNAQ | FRF |
| Var001.1 | DADKYAVT | VETRLID | ERAHHVNAQ | FRF |

**Fig. S3.** Sequence alignment of the predicted *C. muridarum* CM001 and CM006 MOMP porin with other published sequences. Sequences were derived from the following strains; CMUT3-5 (4), G0.1.1, G28.38.1(5), Nigg3-28 (6), Var001, Var001.1, Var003, Var004 (7), Nigg (8), Nigg2MCR(9), Weiss (10). Amino acid ambiguities, substitutions or deletions are indicated in red.

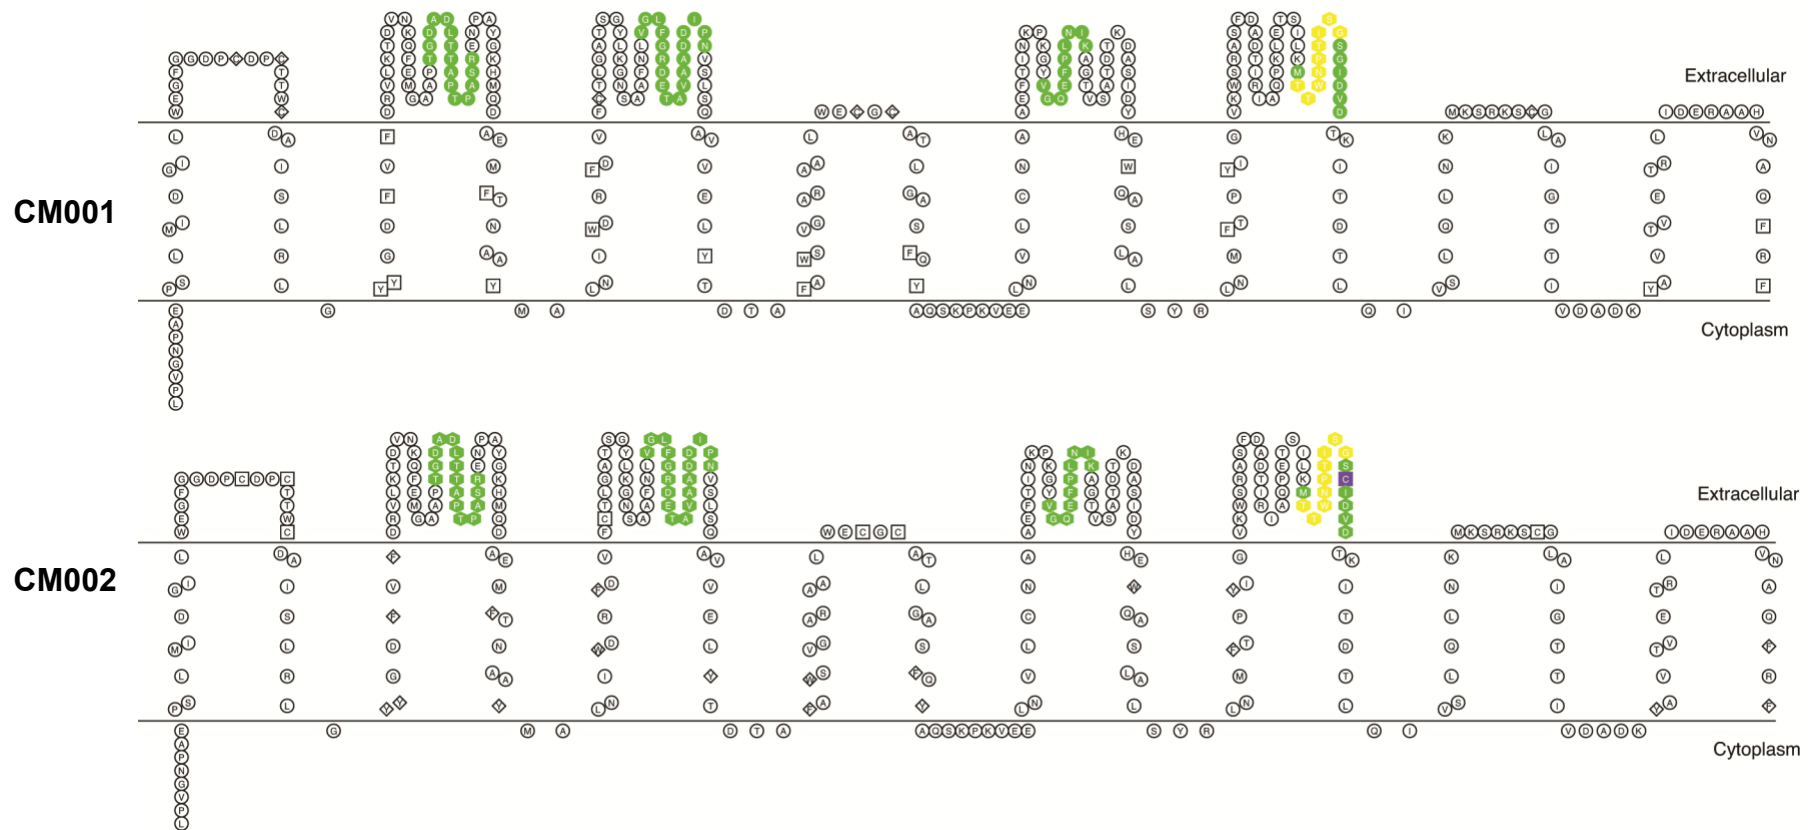

**Fig. S4.** Cartoon depicting the effect of MOMP sequence differences on 2-dimensional protein conformation for *C. muridarum* CM001 (top) and CM002 (bottom). CM002 serves as a representative example of all sequenced clonal isolates derived from *C. muridarum* Nigg. The models were prepared using the Topo2 program (Johns S.J., TOPO2, Transmembrane protein display software, <http://www.sacs.ucsf.edu/TOPO2/>) with data for predicted extracellular and cytoplasmic loops, and transmembrane spanning regions of *C. muridarum* MOMP (11). The variable domains (VD1-4) are indicated in green, the conserved amino acids within VD4 are indicated in yellow and the glycine to cysteine substitution in VD4 present in CM002 is indicated in purple.

## Supplementary Data Bibliography:

1. Baltrus DA, Amieva MR, Covacci A, Lowe TM, Merrell DS, Ottemann KM, Stein M, Salama NR, Guillemin K. 2009. The complete genome sequence of *Helicobacter pylori* strain G27. *J Bacteriol* 191:447-8.
2. Larkin MA, Blackshields G, Brown NP, Chenna R, McGettigan PA, McWilliam H, Valentin F, Wallace IM, Wilm A, Lopez R, Thompson JD, Gibson TJ, Higgins DG. 2007. Clustal W and Clustal X version 2.0. *Bioinformatics* 23:2947-8.
3. Celma L, Corbinais C, Vercruyssen J, Veaute X, de la Sierra-Gallay IL, Guerois R, Busso D, Mathieu A, Marsin S, Quevillon-Cheruel S, Radicella JP. 2017. Structural basis for the substrate selectivity of *Helicobacter pylori* NucT nuclease activity. *PLoS One* 12:e0189049.
4. Lei L, Chen J, Hou S, Ding Y, Yang Z, Zeng H, Baseman J, Zhong G. 2014. Reduced live organism recovery and lack of hydrosalpinx in mice infected with plasmid-free *Chlamydia muridarum*. *Infect Immun* 82:983-92.
5. Chen C, Zhou Z, Conrad T, Yang Z, Dai J, Li Z, Wu Y, Zhong G. 2015. In vitro passage selects for *Chlamydia muridarum* with enhanced infectivity in cultured cells but attenuated pathogenicity in mouse upper genital tract. *Infect Immun* 83:1881-92.
6. Conrad TA, Gong S, Yang Z, Matulich P, Keck J, Beltrami N, Chen C, Zhou Z, Dai J, Zhong G. 2015. The chromosome-encoded hypothetical protein TC0668 is an upper genital tract pathogenicity factor of *Chlamydia muridarum*. *Infect Immun* 84:467-79.
7. Yeruva L, Myers GS, Spencer N, Creasy HH, Adams NE, Maurelli AT, McChesney GR, Cleves MA, Ravel J, Bowlin A, Rank RG. 2014. Early microRNA expression profile as a prognostic biomarker for the development of pelvic inflammatory disease in a mouse model of chlamydial genital infection. *MBio* 5:e01241-14.
8. Read TD, Brunham RC, Shen C, Gill SR, Heidelberg JF, White O, Hickey EK, Peterson J, Utterback T, Berry K, Bass S, Linher K, Weidman J, Khouri H, Craven B, Bowman C, Dodson R, Gwinn M, Nelson W, DeBoy R, Kolonay J, McClarty G, Salzberg SL, Eisen J, Fraser CM. 2000. Genome sequences of *Chlamydia trachomatis* MoPn and *Chlamydia pneumoniae* AR39. *Nucleic Acids Res* 28:1397-406.
9. Bao X, Gylfe A, Sturdevant GL, Gong Z, Xu S, Caldwell HD, Elofsson M, Fan H. 2014. Benzylidene acylhydrazides inhibit chlamydial growth in a type III secretion- and iron chelation-independent manner. *J Bacteriol* 196:2989-3001.
10. Mahmoud SA, Abdel-Hafez AM, El-Sawy M, Saleh ES. 1976. Sodium metabisulfite as a preservative for silage produced from maize plants. *Zentralbl Bakteriell Parasitenkd Infektionskr Hyg* 131:291-9.
11. Rodriguez-Maranon MJ, Bush RM, Peterson EM, Schirmer T, de la Maza LM. 2002. Prediction of the membrane-spanning beta-strands of the major outer membrane protein of *Chlamydia*. *Protein Sci* 11:1854-61.
